# Supplementary material
Source: Research Square preprint supplement (doi:10.21203/rs.3.rs-9212020/v1)
Supplement: Supplementary file 2 [file d602cff79bab225d8766c971.xlsx]

## Sheet: Table legends
Table S1 – Patient and Clinical characteristics
Table S2 – Histology Metrics
Table S3 – CUTseq oligos
Table S4 – TNBC SNV genes
Table S5 – SNV calls, TMB, MSI
Table S6 – SNV drivers
Table S7 – Mutational signatures
Table S8 – SV burden
Table S9 – TNBC CNA genes
Table S10 – GISTIC CNA
Table S11 – GIN, Ploidy, WGD
Table S12 – scarHRD results
Table S13 – Chromosome arm aneuploidy
Table S14 – LMM and GLMM Summary Table

## Sheet: Table S1 - Patient and Clinical
Patient	Date of Diagnosis	Age at Diagnosis	Menopausal Status	BRCA	RAD51C	Tumour Grade at Diagnosis	Tumour stage	Histology	NACT regime	Pathological Response to NACT	Mid NACT Pathological Response	Change in Cellularity after NACT	RCB score	RCB class	Recurrence	Post Surgical Tumour Grade	1st Recurrence Date	Recurrence Site(s)	Status	Date of Death	Overall Suvival (OS)	PFS (time to 1st rec months)	Recurrence to death (mths)
TNBC1	2017-06-09	67	Post	Negative	Negative	3	T3	Invasive carcinoma NST	FEC-D + paclitaxel	pathCR	Partial response	1	0	class 0	n	N/A	N/A	None	Alive	n/a	2687
TNBC2	2016-05-10	55	Post	Negative	Negative	Unknown	T2	NST	FEC-D	pathCR	Partial Response	1	0	class 0	n	N/A	N/A	None	Alive	n/a	3082
TNBC3	2016-01-25	46	Pre	Negative	Negative	3	T2	NST	FEC-D + paclitaxel	pathCR	Partial Response	1	0	class 0	n	N/A	N/A	None	Alive	n/a	3188
TNBC4	2014-12-11	43	Pre	Negative	Negative	3	T2	NST (basal phenotype)	FEC-D	pathCR	Complete Response	1	0	class 0	n	N/A	N/A	None	Alive	n/a	3598
TNBC5	2016-08-11	73	Post	Negative	Negative	2	T2	NST	FEC + paclitaxel	pathCR in breast	Partial Response	100% in breast	0.457	class 1	y	N/A	2019-10-01	Lung, liver	Deceased	2020-01-18	1255	95.5	9.08333
TNBC6	2016-06-02	44	Pre	Positive	Negative	3	T2	Invasive carcinoma NST (basal phenotype)	unknown	pathCR	not determined	1	0	class 0	y	N/A	2018	Skin	Deceased	2021-02-11	1715	48.1667	94.75
TNBC7	2013-10-30	59	Post	Negative	Negative	3	T4d	Invasive carcinoma NST (basal phenotype)	FEC-D + carcoplatin	pathCR in breast	Stable disease	100% in breast	1.094	class 1	y	3	2018-04-27	Axilla, chest wall	Deceased	2023-03-16	3424	136.667	148.667
TNBC8	2014-02-24	52	Pre	Negative	Negative	3	T2	NST	FEC-D	Good Response	Partial Response	0.6	1.23	class 1	n	3	N/A	None	Deceased	2018-03-06	3888		122.583
TNBC9	2021-03-19	48	Peri	Negative	Negative	3	T2	Invasive carcinoma NST	EC + paclitaxel	Partial response	Complete imaging response	0.7	1.336	class 1	n	2	N/A	None	Alive	n/a	1308
TNBC10	2017-03-29	55	Pre	Negative	Negative	2	T2	Invasive carcinmoa NST	FEC-D	Good Response		0.95	1.359	class 1	n	2	N/A	None	Alive	n/a	2759
TNBC11	2014-06-05	59	Post	Negative	Negative	3	T2	Ductal NST	FEC-D + paclitaxel	Good Response	No change	0.75	1.453	class 2	y	2	2015-09-03	breast, breast skin, lung	Deceased	2017-07-04	1125	37.9167	55.8333
TNBC12	2017-10-05	48	Peri	Negative	Negative	3	T2	Invasive carcinoma NST	FEC-D	Partial Response	Partial response	0.5	1.588	class 2	n	2	N/A	None	Alive	n/a	2569
TNBC13	2020-09-24	54	Post	Negative	Negative	3	T3	Invasive carcinoma NST	EC + paclitaxel	Good response	Partial response	0.9	1.697	class 2	n	3	N/A	None	Alive	n/a	1308
TNBC14	2014-04-10	52	Pre	Negative	Negative	3	T2	Ductal NST (basal phenotype)	FEC-D	Good response	Partial Response	unknown	1.761	class 2	y	3	2016-05-24	Lung, nodes, bone, liver, meninges	Deceased	2016-09-12	886	64.5833	9.25
TNBC15	2016-06-01	62	Post	Negative	Negative	3	T2	Ductal NST	FEC-D	Partial Response	Partial Response (minimal)	0.3	1.928	class 2	n	2	N/A	None	Deceased	2022-12-15	2388
TNBC16	2017-10-24	49	Pre	Negative	Negative	3	T2	Invasive carcinoma NST	FEC-D + cyclophosphamide	Partial Response	Partial response	unknown	2.044	class 2	n	3	N/A	None	Alive	n/a	2550
TNBC17	2015-01-29	62	Post	Negative	Negative	3	T2		FEC-D	Poor Response	Partial Response			class 2	y	3	2017-02-11	Peritoneum	Deceased	2019-03-25	1516	62	64.3333
TNBC18	2015-09-11	50	Post	Negative	Negative	3	T2	NST (basal phenotype)	D + cyclophosphamide	Poor Response	Partial Response	0	2.276	class 2	y	3	2017-01-17	lung, pleural cavity, thorax, brain stem	Deceased	2017-09-27	747	41.1667	21.0833
TNBC19	2017-02-10	66	Post	Negative	Negative	2	T2	Invasive carcinoma NST	FEC-D	Good Response	Partial Response	0.8	2.883	class 2	y	2	2020-06-17	Sternum, pleural cavity	Deceased	2021-09-11	1674	101.917	37.5833
TNBC20	2021-02-08	48	Peri	Negative	Negative	3	T2	Invasive carcinoma NST	EC-D	Partial response	Partial response	0.7	2.718	class 2	n	2	N/A	None	Alive	n/a	1347
TNBC21	2015-02-09	52	Peri	Negative	Positive	3	T2	NST	FEC-D	Poor Response	Partial Response	0	3.622	class 3	y	1	2015-11-10	Brain	Deceased	2017-03-01	751	22.8333	39.75
TNBC22	2017-03-22	44	Pre	Negative	Negative	2	T2	Invasive ductal carcinoma	FEC-D	Poor Response	Stable disease	0.5	3.632	class 3	y	2	2018-01-23	Mediastinal node, lung	Deceased	2019-02-22	702	25.5833	58.5

## Sheet: Table S2 - Histology Metrics
Patient	Sample Name	Time-point	Cellularity	TIL (%)
TNBC1	TNBC1_PreT	PreT	55	75
TNBC2	TNBC2_PreT	PreT	45	85
TNBC3	TNBC3_PreT	PreT	17.5	45
TNBC4	TNBC4_PreT	PreT	50	15
TNBC5	TNBC5_PreT	PreT	45	65
TNBC6	TNBC6_PreT	PreT	85	75
TNBC6	TNBC6-rec_Skin	R	95	15
TNBC6	TNBC6-rec_Node	R	60	n/a
TNBC7	TNBC7_PreT	PreT	50	10
TNBC7	TNBC7-rec_Skin	R	70	1
TNBC7	TNBC7-rec_Node	R	80	n/a
TNBC8	TNBC8_PreT	PreT	60	30
TNBC8	TNBC8-PostT	PostT	95	2
TNBC9	TNBC9_PreT	PreT	40	70
TNBC9	TNBC9-PostT	PostT	95	15
TNBC10	TNBC10_PreT	PreT	70	2
TNBC10	TNBC10-PostT_Area1	PostT	90	30
TNBC10	TNBC10-PostT_Area2	PostT	80	30
TNBC10	TNBC10-PostT_Area3	PostT	80	30
TNBC11	TNBC11_PreT	PreT	90	2
TNBC11	TNBC11-mid	MidT	17.5	2
TNBC11	TNBC11-PostT_Area1	PostT	80	2
TNBC11	TNBC11-PostT_Area2	PostT	70	2
TNBC11	TNBC11-rec	R	70	2
TNBC12	TNBC12_PreT	PreT	17.5	35
TNBC12	TNBC12-PostT	PostT	70	5
TNBC13	TNBC13_PreT	PreT	50	75
TNBC13	TNBC13-mid	MidT	50	35
TNBC14	TNBC14_PreT	PreT	90	15
TNBC14	TNBC14-PostT_Area2	PostT	90	15
TNBC14	TNBC14-PostT_Area1	PostT	95	15
TNBC14	TNBC14-PostT_Area4	PostT	95	15
TNBC14	TNBC14-PostT_Area3	PostT	90	15
TNBC15	TNBC15_PreT	PreT	55	12
TNBC15	TNBC15-mid	MidT	10	2
TNBC15	TNBC15-PostT_Area1	PostT	95	15
TNBC15	TNBC15-PostT_Area2	PostT	90	15
TNBC15	TNBC15-PostT_Area3	PostT	90	15
TNBC16	TNBC16_PreT	PreT	12.5	25
TNBC16	TNBC16-PostT_Area1	PostT	90	50
TNBC16	TNBC16-PostT_Area2	PostT	80	50
TNBC16	TNBC16-PostT_Area3	PostT	90	50
TNBC17	TNBC17_PreT	PreT	40	25
TNBC17	TNBC17-PostT	PostT	90	70
TNBC17	TNBC17-rec	R	95	5
TNBC18	TNBC18_PreT	PreT	17.5	1
TNBC18	TNBC18-PostT_Area1	PostT	95	2
TNBC18	TNBC18-PostT_Area2	PostT	95	2
TNBC18	TNBC18-PostT_Area3	PostT	95	2
TNBC18	TNBC18-PostT_Area4	PostT	90	2
TNBC18	TNBC18-rec	R	25	2
TNBC19	TNBC19_PreT	PreT	70	15
TNBC19	TNBC19-PostT_Area2	PostT	60	20
TNBC19	TNBC19-PostT_Area1	PostT	50	20
TNBC19	TNBC19-PostT_Area4	PostT	60	20
TNBC19	TNBC19-PostT_Area3	PostT	60	20
TNBC20	TNBC20_PreT	PreT	50	20
TNBC20	TNBC20-PostT_Area1	PostT	95	5
TNBC20	TNBC20-PostT_Area2	PostT	80	5
TNBC20	TNBC20-PostT_Area3	PostT	70	5
TNBC21	TNBC21_PreT	PreT	27.5	30
TNBC21	TNBC21-mid	MidT	65	30
TNBC21	TNBC21-PostT_Area1	PostT	95	20
TNBC21	TNBC21-PostT_Area2	PostT	90	20
TNBC21	TNBC21-rec_Area1	R	95	5
TNBC21	TNBC21-rec_Area3	R	80	5
TNBC21	TNBC21-rec_Area2	R	90	5
TNBC21	TNBC21-rec_Area4	R	80	5
TNBC22	TNBC22_PreT	PreT	80	2
TNBC22	TNBC22-PostT_Area1	PostT	70	5
TNBC22	TNBC22-PostT_Area2	PostT	80	5
TNBC22	TNBC22-PostT_Area3	PostT	90	5
TNBC22	TNBC22-PostT_Area4	PostT	90	5
TNBC22	TNBC22-rec	R	50	2
n/a = not applicable

## Sheet: Table S3 - CUTseq oligos
HindIII Adapters
Adapter ID	Oligo*	Sequence (5'-3')	Oligo parts (5'->3')
A1	Upper	AGCTT_GCGTGATG_NNNNNNNN_GATCGTCGGACTGTAGAACTCTGAAC_CCCTATAGTGAGTCGTATTACCGGCCTCAATCG_AA	HindIII_barcode_UMI_RA5_T7_overhang
	Bottom	CGATTGAGGCCGGTAATACGACTCACTATAGGG_GTTCAGAGTTCTACAGTCCGACGATC_NNNNNNNN_CATCACGC_A	T7_RA5_UMI_barcode_HindIII
A2	Upper	AGCTT_GCGACGAC_NNNNNNNN_GATCGTCGGACTGTAGAACTCTGAAC_CCCTATAGTGAGTCGTATTACCGGCCTCAATCG_AA	HindIII_barcode_UMI_RA5_T7_overhang
	Bottom	CGATTGAGGCCGGTAATACGACTCACTATAGGG_GTTCAGAGTTCTACAGTCCGACGATC_NNNNNNNN_GTCGTCGC_A	T7_RA5_UMI_barcode_HindIII
A3	Upper	AGCTT_GCGGTCGT_NNNNNNNN_GATCGTCGGACTGTAGAACTCTGAAC_CCCTATAGTGAGTCGTATTACCGGCCTCAATCG_AA	HindIII_barcode_UMI_RA5_T7_overhang
	Bottom	CGATTGAGGCCGGTAATACGACTCACTATAGGG_GTTCAGAGTTCTACAGTCCGACGATC_NNNNNNNN_ACGACCGC_A	T7_RA5_UMI_barcode_HindIII
A4	Upper	AGCTT_GCGCATCA_NNNNNNNN_GATCGTCGGACTGTAGAACTCTGAAC_CCCTATAGTGAGTCGTATTACCGGCCTCAATCG_AA	HindIII_barcode_UMI_RA5_T7_overhang
	Bottom	CGATTGAGGCCGGTAATACGACTCACTATAGGG_GTTCAGAGTTCTACAGTCCGACGATC_NNNNNNNN_TGATGCGC_A	T7_RA5_UMI_barcode_HindIII
A5	Upper	AGCTT_GATTGATG_NNNNNNNN_GATCGTCGGACTGTAGAACTCTGAAC_CCCTATAGTGAGTCGTATTACCGGCCTCAATCG_AA	HindIII_barcode_UMI_RA5_T7_overhang
	Bottom	CGATTGAGGCCGGTAATACGACTCACTATAGGG_GTTCAGAGTTCTACAGTCCGACGATC_NNNNNNNN_CATCAATC_A	T7_RA5_UMI_barcode_HindIII
A6	Upper	AGCTT_GATACGAC_NNNNNNNN_GATCGTCGGACTGTAGAACTCTGAAC_CCCTATAGTGAGTCGTATTACCGGCCTCAATCG_AA	HindIII_barcode_UMI_RA5_T7_overhang
	Bottom	CGATTGAGGCCGGTAATACGACTCACTATAGGG_GTTCAGAGTTCTACAGTCCGACGATC_NNNNNNNN_GTCGTATC_A	T7_RA5_UMI_barcode_HindIII
A7	Upper	AGCTT_GATGTCGT_NNNNNNNN_GATCGTCGGACTGTAGAACTCTGAAC_CCCTATAGTGAGTCGTATTACCGGCCTCAATCG_AA	HindIII_barcode_UMI_RA5_T7_overhang
	Bottom	CGATTGAGGCCGGTAATACGACTCACTATAGGG_GTTCAGAGTTCTACAGTCCGACGATC_NNNNNNNN_ACGACATC_A	T7_RA5_UMI_barcode_HindIII
A8	Upper	AGCTT_GATCATCA_NNNNNNNN_GATCGTCGGACTGTAGAACTCTGAAC_CCCTATAGTGAGTCGTATTACCGGCCTCAATCG_AA	HindIII_barcode_UMI_RA5_T7_overhang
	Bottom	CGATTGAGGCCGGTAATACGACTCACTATAGGG_GTTCAGAGTTCTACAGTCCGACGATC_NNNNNNNN_TGATGATC_A	T7_RA5_UMI_barcode_HindIII
A9	Upper	AGCTT_GGATGATG_NNNNNNNN_GATCGTCGGACTGTAGAACTCTGAAC_CCCTATAGTGAGTCGTATTACCGGCCTCAATCG_AA	HindIII_barcode_UMI_RA5_T7_overhang
	Bottom	CGATTGAGGCCGGTAATACGACTCACTATAGGG_GTTCAGAGTTCTACAGTCCGACGATC_NNNNNNNN_CATCATCC_A	T7_RA5_UMI_barcode_HindIII
A10	Upper	AGCTT_GGAACGAC_NNNNNNNN_GATCGTCGGACTGTAGAACTCTGAAC_CCCTATAGTGAGTCGTATTACCGGCCTCAATCG_AA	HindIII_barcode_UMI_RA5_T7_overhang
	Bottom	CGATTGAGGCCGGTAATACGACTCACTATAGGG_GTTCAGAGTTCTACAGTCCGACGATC_NNNNNNNN_GTCGTTCC_A	T7_RA5_UMI_barcode_HindIII
A11	Upper	AGCTT_GGAGTCGT_NNNNNNNN_GATCGTCGGACTGTAGAACTCTGAAC_CCCTATAGTGAGTCGTATTACCGGCCTCAATCG_AA	HindIII_barcode_UMI_RA5_T7_overhang
	Bottom	CGATTGAGGCCGGTAATACGACTCACTATAGGG_GTTCAGAGTTCTACAGTCCGACGATC_NNNNNNNN_ACGACTCC_A	T7_RA5_UMI_barcode_HindIII
A12	Upper	AGCTT_GGACATCA_NNNNNNNN_GATCGTCGGACTGTAGAACTCTGAAC_CCCTATAGTGAGTCGTATTACCGGCCTCAATCG_AA	HindIII_barcode_UMI_RA5_T7_overhang
	Bottom	CGATTGAGGCCGGTAATACGACTCACTATAGGG_GTTCAGAGTTCTACAGTCCGACGATC_NNNNNNNN_TGATGTCC_A	T7_RA5_UMI_barcode_HindIII
A13	Upper	AGCTT_TTCTGATG_NNNNNNNN_GATCGTCGGACTGTAGAACTCTGAAC_CCCTATAGTGAGTCGTATTACCGGCCTCAATCG_AA	HindIII_barcode_UMI_RA5_T7_overhang
	Bottom	CGATTGAGGCCGGTAATACGACTCACTATAGGG_GTTCAGAGTTCTACAGTCCGACGATC_NNNNNNNN_CATCAGAA_A	T7_RA5_UMI_barcode_HindIII
A14	Upper	AGCTT_TTCACGAC_NNNNNNNN_GATCGTCGGACTGTAGAACTCTGAAC_CCCTATAGTGAGTCGTATTACCGGCCTCAATCG_AA	HindIII_barcode_UMI_RA5_T7_overhang
	Bottom	CGATTGAGGCCGGTAATACGACTCACTATAGGG_GTTCAGAGTTCTACAGTCCGACGATC_NNNNNNNN_GTCGTGAA_A	T7_RA5_UMI_barcode_HindIII
A15	Upper	AGCTT_TTCGTCGT_NNNNNNNN_GATCGTCGGACTGTAGAACTCTGAAC_CCCTATAGTGAGTCGTATTACCGGCCTCAATCG_AA	HindIII_barcode_UMI_RA5_T7_overhang
	Bottom	CGATTGAGGCCGGTAATACGACTCACTATAGGG_GTTCAGAGTTCTACAGTCCGACGATC_NNNNNNNN_ACGACGAA_A	T7_RA5_UMI_barcode_HindIII
A16	Upper	AGCTT_TTCCATCA_NNNNNNNN_GATCGTCGGACTGTAGAACTCTGAAC_CCCTATAGTGAGTCGTATTACCGGCCTCAATCG_AA	HindIII_barcode_UMI_RA5_T7_overhang
	Bottom	CGATTGAGGCCGGTAATACGACTCACTATAGGG_GTTCAGAGTTCTACAGTCCGACGATC_NNNNNNNN_TGATGGAA_A	T7_RA5_UMI_barcode_HindIII
A17	Upper	AGCTT_GCGTGTGA_NNNNNNNN_GATCGTCGGACTGTAGAACTCTGAAC_CCCTATAGTGAGTCGTATTACCGGCCTCAATCG_AA	HindIII_barcode_UMI_RA5_T7_overhang
	Bottom	CGATTGAGGCCGGTAATACGACTCACTATAGGG_GTTCAGAGTTCTACAGTCCGACGATC_NNNNNNNN_TCACACGC_A	T7_RA5_UMI_barcode_HindIII
A18	Upper	AGCTT_GCGACACG_NNNNNNNN_GATCGTCGGACTGTAGAACTCTGAAC_CCCTATAGTGAGTCGTATTACCGGCCTCAATCG_AA	HindIII_barcode_UMI_RA5_T7_overhang
	Bottom	CGATTGAGGCCGGTAATACGACTCACTATAGGG_GTTCAGAGTTCTACAGTCCGACGATC_NNNNNNNN_CGTGTCGC_A	T7_RA5_UMI_barcode_HindIII
A19	Upper	AGCTT_GCGGTGTC_NNNNNNNN_GATCGTCGGACTGTAGAACTCTGAAC_CCCTATAGTGAGTCGTATTACCGGCCTCAATCG_AA	HindIII_barcode_UMI_RA5_T7_overhang
	Bottom	CGATTGAGGCCGGTAATACGACTCACTATAGGG_GTTCAGAGTTCTACAGTCCGACGATC_NNNNNNNN_GACACCGC_A	T7_RA5_UMI_barcode_HindIII
A20	Upper	AGCTT_GCGCACAT_NNNNNNNN_GATCGTCGGACTGTAGAACTCTGAAC_CCCTATAGTGAGTCGTATTACCGGCCTCAATCG_AA	HindIII_barcode_UMI_RA5_T7_overhang
	Bottom	CGATTGAGGCCGGTAATACGACTCACTATAGGG_GTTCAGAGTTCTACAGTCCGACGATC_NNNNNNNN_ATGTGCGC_A	T7_RA5_UMI_barcode_HindIII
A21	Upper	AGCTT_TGATGTGA_NNNNNNNN_GATCGTCGGACTGTAGAACTCTGAAC_CCCTATAGTGAGTCGTATTACCGGCCTCAATCG_AA	HindIII_barcode_UMI_RA5_T7_overhang
	Bottom	CGATTGAGGCCGGTAATACGACTCACTATAGGG_GTTCAGAGTTCTACAGTCCGACGATC_NNNNNNNN_TCACATCA_A	T7_RA5_UMI_barcode_HindIII
A22	Upper	AGCTT_TGAACACG_NNNNNNNN_GATCGTCGGACTGTAGAACTCTGAAC_CCCTATAGTGAGTCGTATTACCGGCCTCAATCG_AA	HindIII_barcode_UMI_RA5_T7_overhang
	Bottom	CGATTGAGGCCGGTAATACGACTCACTATAGGG_GTTCAGAGTTCTACAGTCCGACGATC_NNNNNNNN_CGTGTTCA_A	T7_RA5_UMI_barcode_HindIII
A23	Upper	AGCTT_TGAGTGTC_NNNNNNNN_GATCGTCGGACTGTAGAACTCTGAAC_CCCTATAGTGAGTCGTATTACCGGCCTCAATCG_AA	HindIII_barcode_UMI_RA5_T7_overhang
	Bottom	CGATTGAGGCCGGTAATACGACTCACTATAGGG_GTTCAGAGTTCTACAGTCCGACGATC_NNNNNNNN_GACACTCA_A	T7_RA5_UMI_barcode_HindIII
A24	Upper	AGCTT_TGACACAT_NNNNNNNN_GATCGTCGGACTGTAGAACTCTGAAC_CCCTATAGTGAGTCGTATTACCGGCCTCAATCG_AA	HindIII_barcode_UMI_RA5_T7_overhang
	Bottom	CGATTGAGGCCGGTAATACGACTCACTATAGGG_GTTCAGAGTTCTACAGTCCGACGATC_NNNNNNNN_ATGTGTCA_A	T7_RA5_UMI_barcode_HindIII
A25	Upper	AGCTT_CTCTGTGA_NNNNNNNN_GATCGTCGGACTGTAGAACTCTGAAC_CCCTATAGTGAGTCGTATTACCGGCCTCAATCG_AA	HindIII_barcode_UMI_RA5_T7_overhang
	Bottom	CGATTGAGGCCGGTAATACGACTCACTATAGGG_GTTCAGAGTTCTACAGTCCGACGATC_NNNNNNNN_TCACAGAG_A	T7_RA5_UMI_barcode_HindIII
A26	Upper	AGCTT_CTCACACG_NNNNNNNN_GATCGTCGGACTGTAGAACTCTGAAC_CCCTATAGTGAGTCGTATTACCGGCCTCAATCG_AA	HindIII_barcode_UMI_RA5_T7_overhang
	Bottom	CGATTGAGGCCGGTAATACGACTCACTATAGGG_GTTCAGAGTTCTACAGTCCGACGATC_NNNNNNNN_CGTGTGAG_A	T7_RA5_UMI_barcode_HindIII
A27	Upper	AGCTT_CTCGTGTC_NNNNNNNN_GATCGTCGGACTGTAGAACTCTGAAC_CCCTATAGTGAGTCGTATTACCGGCCTCAATCG_AA	HindIII_barcode_UMI_RA5_T7_overhang
	Bottom	CGATTGAGGCCGGTAATACGACTCACTATAGGG_GTTCAGAGTTCTACAGTCCGACGATC_NNNNNNNN_GACACGAG_A	T7_RA5_UMI_barcode_HindIII
A28	Upper	AGCTT_CTCCACAT_NNNNNNNN_GATCGTCGGACTGTAGAACTCTGAAC_CCCTATAGTGAGTCGTATTACCGGCCTCAATCG_AA	HindIII_barcode_UMI_RA5_T7_overhang
	Bottom	CGATTGAGGCCGGTAATACGACTCACTATAGGG_GTTCAGAGTTCTACAGTCCGACGATC_NNNNNNNN_ATGTGGAG_A	T7_RA5_UMI_barcode_HindIII
A29	Upper	AGCTT_GCGGTTAG_NNNNNNNN_GATCGTCGGACTGTAGAACTCTGAAC_CCCTATAGTGAGTCGTATTACCGGCCTCAATCG_AA	HindIII_barcode_UMI_RA5_T7_overhang
	Bottom	CGATTGAGGCCGGTAATACGACTCACTATAGGG_GTTCAGAGTTCTACAGTCCGACGATC_NNNNNNNN_CTAACCGC_A	T7_RA5_UMI_barcode_HindIII
A30	Upper	AGCTT_GCGCAAGC_NNNNNNNN_GATCGTCGGACTGTAGAACTCTGAAC_CCCTATAGTGAGTCGTATTACCGGCCTCAATCG_AA	HindIII_barcode_UMI_RA5_T7_overhang
	Bottom	CGATTGAGGCCGGTAATACGACTCACTATAGGG_GTTCAGAGTTCTACAGTCCGACGATC_NNNNNNNN_GCTTGCGC_A	T7_RA5_UMI_barcode_HindIII
A31	Upper	AGCTT_GCGTGGCT_NNNNNNNN_GATCGTCGGACTGTAGAACTCTGAAC_CCCTATAGTGAGTCGTATTACCGGCCTCAATCG_AA	HindIII_barcode_UMI_RA5_T7_overhang
	Bottom	CGATTGAGGCCGGTAATACGACTCACTATAGGG_GTTCAGAGTTCTACAGTCCGACGATC_NNNNNNNN_AGCCACGC_A	T7_RA5_UMI_barcode_HindIII
A32	Upper	AGCTT_GCGACCTA_NNNNNNNN_GATCGTCGGACTGTAGAACTCTGAAC_CCCTATAGTGAGTCGTATTACCGGCCTCAATCG_AA	HindIII_barcode_UMI_RA5_T7_overhang
	Bottom	CGATTGAGGCCGGTAATACGACTCACTATAGGG_GTTCAGAGTTCTACAGTCCGACGATC_NNNNNNNN_TAGGTCGC_A	T7_RA5_UMI_barcode_HindIII
A33	Upper	AGCTT_TGAGTTAG_NNNNNNNN_GATCGTCGGACTGTAGAACTCTGAAC_CCCTATAGTGAGTCGTATTACCGGCCTCAATCG_AA	HindIII_barcode_UMI_RA5_T7_overhang
	Bottom	CGATTGAGGCCGGTAATACGACTCACTATAGGG_GTTCAGAGTTCTACAGTCCGACGATC_NNNNNNNN_CTAACTCA_A	T7_RA5_UMI_barcode_HindIII
A34	Upper	AGCTT_TGACAAGC_NNNNNNNN_GATCGTCGGACTGTAGAACTCTGAAC_CCCTATAGTGAGTCGTATTACCGGCCTCAATCG_AA	HindIII_barcode_UMI_RA5_T7_overhang
	Bottom	CGATTGAGGCCGGTAATACGACTCACTATAGGG_GTTCAGAGTTCTACAGTCCGACGATC_NNNNNNNN_GCTTGTCA_A	T7_RA5_UMI_barcode_HindIII
A35	Upper	AGCTT_TGATGGCT_NNNNNNNN_GATCGTCGGACTGTAGAACTCTGAAC_CCCTATAGTGAGTCGTATTACCGGCCTCAATCG_AA	HindIII_barcode_UMI_RA5_T7_overhang
	Bottom	CGATTGAGGCCGGTAATACGACTCACTATAGGG_GTTCAGAGTTCTACAGTCCGACGATC_NNNNNNNN_AGCCATCA_A	T7_RA5_UMI_barcode_HindIII
A36	Upper	AGCTT_TGAACCTA_NNNNNNNN_GATCGTCGGACTGTAGAACTCTGAAC_CCCTATAGTGAGTCGTATTACCGGCCTCAATCG_AA	HindIII_barcode_UMI_RA5_T7_overhang
	Bottom	CGATTGAGGCCGGTAATACGACTCACTATAGGG_GTTCAGAGTTCTACAGTCCGACGATC_NNNNNNNN_TAGGTTCA_A	T7_RA5_UMI_barcode_HindIII
A37	Upper	AGCTT_CTCGTTAG_NNNNNNNN_GATCGTCGGACTGTAGAACTCTGAAC_CCCTATAGTGAGTCGTATTACCGGCCTCAATCG_AA	HindIII_barcode_UMI_RA5_T7_overhang
	Bottom	CGATTGAGGCCGGTAATACGACTCACTATAGGG_GTTCAGAGTTCTACAGTCCGACGATC_NNNNNNNN_CTAACGAG_A	T7_RA5_UMI_barcode_HindIII
A38	Upper	AGCTT_CTCCAAGC_NNNNNNNN_GATCGTCGGACTGTAGAACTCTGAAC_CCCTATAGTGAGTCGTATTACCGGCCTCAATCG_AA	HindIII_barcode_UMI_RA5_T7_overhang
	Bottom	CGATTGAGGCCGGTAATACGACTCACTATAGGG_GTTCAGAGTTCTACAGTCCGACGATC_NNNNNNNN_GCTTGGAG_A	T7_RA5_UMI_barcode_HindIII
A39	Upper	AGCTT_CTCTGGCT_NNNNNNNN_GATCGTCGGACTGTAGAACTCTGAAC_CCCTATAGTGAGTCGTATTACCGGCCTCAATCG_AA	HindIII_barcode_UMI_RA5_T7_overhang
	Bottom	CGATTGAGGCCGGTAATACGACTCACTATAGGG_GTTCAGAGTTCTACAGTCCGACGATC_NNNNNNNN_AGCCAGAG_A	T7_RA5_UMI_barcode_HindIII
A40	Upper	AGCTT_CTCACCTA_NNNNNNNN_GATCGTCGGACTGTAGAACTCTGAAC_CCCTATAGTGAGTCGTATTACCGGCCTCAATCG_AA	HindIII_barcode_UMI_RA5_T7_overhang
	Bottom	CGATTGAGGCCGGTAATACGACTCACTATAGGG_GTTCAGAGTTCTACAGTCCGACGATC_NNNNNNNN_TAGGTGAG_A	T7_RA5_UMI_barcode_HindIII
A41	Upper	AGCTT_TCGGATTC_NNNNNNNN_GATCGTCGGACTGTAGAACTCTGAAC_CCCTATAGTGAGTCGTATTACCGGCCTCAATCG_AA	HindIII_barcode_UMI_RA5_T7_overhang
	Bottom	CGATTGAGGCCGGTAATACGACTCACTATAGGG_GTTCAGAGTTCTACAGTCCGACGATC_NNNNNNNN_GAATCCGA_A	T7_RA5_UMI_barcode_HindIII
A42	Upper	AGCTT_TCGCGAAT_NNNNNNNN_GATCGTCGGACTGTAGAACTCTGAAC_CCCTATAGTGAGTCGTATTACCGGCCTCAATCG_AA	HindIII_barcode_UMI_RA5_T7_overhang
	Bottom	CGATTGAGGCCGGTAATACGACTCACTATAGGG_GTTCAGAGTTCTACAGTCCGACGATC_NNNNNNNN_ATTCGCGA_A	T7_RA5_UMI_barcode_HindIII
A43	Upper	AGCTT_TCGTCGGA_NNNNNNNN_GATCGTCGGACTGTAGAACTCTGAAC_CCCTATAGTGAGTCGTATTACCGGCCTCAATCG_AA	HindIII_barcode_UMI_RA5_T7_overhang
	Bottom	CGATTGAGGCCGGTAATACGACTCACTATAGGG_GTTCAGAGTTCTACAGTCCGACGATC_NNNNNNNN_TCCGACGA_A	T7_RA5_UMI_barcode_HindIII
A44	Upper	AGCTT_TCGATCCG_NNNNNNNN_GATCGTCGGACTGTAGAACTCTGAAC_CCCTATAGTGAGTCGTATTACCGGCCTCAATCG_AA	HindIII_barcode_UMI_RA5_T7_overhang
	Bottom	CGATTGAGGCCGGTAATACGACTCACTATAGGG_GTTCAGAGTTCTACAGTCCGACGATC_NNNNNNNN_CGGATCGA_A	T7_RA5_UMI_barcode_HindIII
A45	Upper	AGCTT_GATGATTC_NNNNNNNN_GATCGTCGGACTGTAGAACTCTGAAC_CCCTATAGTGAGTCGTATTACCGGCCTCAATCG_AA	HindIII_barcode_UMI_RA5_T7_overhang
	Bottom	CGATTGAGGCCGGTAATACGACTCACTATAGGG_GTTCAGAGTTCTACAGTCCGACGATC_NNNNNNNN_GAATCATC_A	T7_RA5_UMI_barcode_HindIII
A46	Upper	AGCTT_GATCGAAT_NNNNNNNN_GATCGTCGGACTGTAGAACTCTGAAC_CCCTATAGTGAGTCGTATTACCGGCCTCAATCG_AA	HindIII_barcode_UMI_RA5_T7_overhang
	Bottom	CGATTGAGGCCGGTAATACGACTCACTATAGGG_GTTCAGAGTTCTACAGTCCGACGATC_NNNNNNNN_ATTCGATC_A	T7_RA5_UMI_barcode_HindIII
A47	Upper	AGCTT_GATTCGGA_NNNNNNNN_GATCGTCGGACTGTAGAACTCTGAAC_CCCTATAGTGAGTCGTATTACCGGCCTCAATCG_AA	HindIII_barcode_UMI_RA5_T7_overhang
	Bottom	CGATTGAGGCCGGTAATACGACTCACTATAGGG_GTTCAGAGTTCTACAGTCCGACGATC_NNNNNNNN_TCCGAATC_A	T7_RA5_UMI_barcode_HindIII
A48	Upper	AGCTT_GATATCCG_NNNNNNNN_GATCGTCGGACTGTAGAACTCTGAAC_CCCTATAGTGAGTCGTATTACCGGCCTCAATCG_AA	HindIII_barcode_UMI_RA5_T7_overhang
	Bottom	CGATTGAGGCCGGTAATACGACTCACTATAGGG_GTTCAGAGTTCTACAGTCCGACGATC_NNNNNNNN_CGGATATC_A	T7_RA5_UMI_barcode_HindIII
Library prep Oligos		Sequence (5'-3')
RA3		TGGAATTCTCGGGTGCCAAGG
RTP		GCCTTGGCACCCGAGAATTCCA
RP1		AATGATACGGCGACCACCGAGATCTACACGTTCAGAGTTCTACAGTCCGA
RPIndex		CAAGCAGAAGACGGCATACGAGATnnnnnnGTGACTGGAGTTCCTTGGCACCCGAGAATTCCA
RPI2		nnnnnn = CGATGT
RPI3		nnnnnn = TTAGGC

## Sheet: Table S4 - TNBC SNV genes
Gene	TCGA	Lehmann, et al 2021	Derakhshan, et al 2022	Chen et al 2020	Jaing et al, 2019	Shah et al, 2012	Li et al, 2024
PIK3CA	x	x	x	x	x	x	x
PTEN	x	x	x	x	x	x	x
RB1	x	x	x	x	x	x	x
TP53	x	x	x	x	x	x	x
BRCA1	x	x	x	x			x
NF1		x	x	x	x		x
ATM		x				x	x
BRCA2	x	x					x
CREBBP	x					x	x
EGFR		x				x	x
FBXW7	x	x		x
PIK3R1	x		x		x
AKT1					x		x
ARID1A		x					x
ARID1B	x	x
ASXL2	x	x
ATR				x	x
ATRX					x		x
FANCD2		x					x
KDM6A		x		x
MCL1		x	x
NOTCH1		x					x
NOTCH2		x			x
PRKDC	x					x
ADCY9						x
AKT			x
ALK							x
ANKRD11	x
APC				x
ASH2L		x
ASXL3		x
B2M		x
BAP1		x
BCL7C		x
BCL9	x
BRAF		x
CBFB				x
CD86				x
CDH1			x
CDH23							x
CLCA1						x
CTNNA1							x
CTNNB1							x
CYP2A6						x
CYP2D6							x
DGKI						x
DNMT1		x
EP300							x
EPHB1							x
ERBB2		x
EZH2		x
FOXA1				x
GATA3			x
GRIN2A	x
HCFC1		x
HEXA						x
HMGCS2						x
HRAS		x
IDH3B						x
IDO1		x
IFNGR1				x
INPPL1	x
JAK1						x
KRAS		x
LCLAT1						x
MAN2A2						x
MAP2K1		x
MAPK9		x
MED12	x
MLL3							x
MYC		x
MYH9	x
NCOR1	x
NOTCH3		x
NR3C1						x
NRAS						x
OR4N4						x
PAPSS2						x
PCLO	x
PGM2						x
PLD1						x
POLR1A						x
PRPS2						x
RBM47				x
RELN	x
RNF213	x
RRM2						x
SLX4							x
SMARCA4		x
SMARCAD1		x
SMG1	x
STAT4	x
THP2						x
TPR	x
TSC1							x
UBR5	x
UGT2B17						x
VHL							x
Lehmann BD, Colaprico A, Silva TC, Chen J, An H, Ban Y, et al. Multi-omics analysis identifies therapeutic vulnerabilities in triple-negative breast cancer subtypes. Nat Commun. 2021;12:6276.
Jiang Y-Z, Ma D, Suo C, Shi J, Xue M, Hu X, et al. Genomic and Transcriptomic Landscape of Triple-Negative Breast Cancers: Subtypes and Treatment Strategies. Cancer Cell. 2019;35:428-440.e5.
Chen H, Chong W, Yang X, Zhang Y, Sang S, Li X, et al. Age-related mutational signature negatively associated with immune activity and survival outcome in triple-negative breast cancer. Oncoimmunology. 2020;9:1788252.
Derakhshan F, Reis-Filho JS. Pathogenesis of Triple-Negative Breast Cancer. Annual Review of Pathology: Mechanisms of Disease. 2022;17:181–204.
Shah SP, Roth A, Goya R, Oloumi A, Ha G, Zhao Y, et al. The clonal and mutational evolution spectrum of primary triple-negative breast cancers. Nature. 2012;486:395–9.
Li RQ, Yan L, Zhang L, Ma HX, Wang HW, Bu P, et al. Genomic characterization reveals distinct mutational landscapes and therapeutic implications between different molecular subtypes of triple-negative breast cancer. Sci Rep. 2024;14:12386.

## Sheet: Table S5 - SNV calls, TMB, MSI
Patient	Sample Name	Time-point	TMB	MSI				Mutational Matrix - Genes x Sample
			TMB (muts/Mb)	Total Number of Sites	Number of Somatic Sites	MSI		Sample Name	ALK	APC	ARID1B	ASH2L	ASXL2	ASXL3	ATM	ATR	ATRX	BCL9	BRAF	BRCA1	BRCA2	CD86	CDH23	CREBBP	CTNNA1	CYP2A6	CYP2D6	DNMT1	EGFR	EP300	ERBB2	EZH2	FANCD2	FBXW7	GRIN2A	IFNGR1	INPPL1	JAK1	KDM6A	LCLAT1	MAN2A2	MCL1	MICA	MYH9	NCOR1	NF1	NOTCH1	NOTCH2	PAPSS2
TNBC1	TNBC1_PreT	PreT	11.8871	12828	1227	9.57		TNBC1_PreT											Splice_Site		Missense_Mutation		Missense_Mutation	Missense_Mutation																			Missense_Mutation					Nonsense_Mutation
TNBC2	TNBC2_PreT	PreT	8.9564	11826	1178	9.96		TNBC2_PreT						Missense_Mutation						Missense_Mutation							Missense_Mutation	Missense_Mutation															Frame_Shift_Del
TNBC3	TNBC3_PreT	PreT	13.0101	13441	1603	11.93		TNBC3_PreT						Missense_Mutation							Missense_Mutation						multi_hit														Missense_Mutation								Missense_Mutation
TNBC4	TNBC4_PreT	PreT	8.05255	9803	1194	12.18		TNBC4_PreT												Missense_Mutation			Missense_Mutation																		Missense_Mutation		Frame_Shift_Ins
TNBC5	TNBC5_PreT	PreT	18.981	11898	1737	14.6		TNBC5_PreT							Missense_Mutation												Missense_Mutation										Missense_Mutation
TNBC6	TNBC6_PreT	PreT	1.42426	10887	20	0.18		TNBC6_PreT												Nonsense_Mutation;germline
TNBC6	TNBC6-rec_Node	R	1.5886	12064	6	0.05		TNBC6-rec_Node												Nonsense_Mutation;germline
TNBC6	TNBC6-rec_Skin	R	2.21856	10245	32	0.31		TNBC6-rec_Skin												Nonsense_Mutation;germline
TNBC7	TNBC7-rec_Skin	R	9.55897	14414	1449	10.05		TNBC7-rec_Skin																							Missense_Mutation;novel							Missense_Mutation;novel										Missense_Mutation
TNBC7	TNBC7_PreT	PreT	10.4902	13139	1258	9.57		TNBC7_PreT																									Missense_Mutation															Missense_Mutation
TNBC7	TNBC7-rec_Node	R	7.1213	11016	1123	10.19		TNBC7-rec_Node																									Missense_Mutation									Missense_Mutation;novel						Missense_Mutation
TNBC8	TNBC8_PreT	PreT	9.25769	11700	1371	11.72		TNBC8_PreT													Missense_Mutation
TNBC8	TNBC8-PostT	PostT	10.4902	11495	1405	12.22		TNBC8-PostT															Splice_Site;novel													Frame_Shift_Ins;novel
TNBC9	TNBC9-PostT	PostT	11.175	19711	2269	11.51		TNBC9-PostT	Missense_Mutation;novel											multi_hit;novel																							Missense_Mutation;novel
TNBC9	TNBC9_PreT	PreT	7.09391	17791	1785	10.03		TNBC9_PreT										Missense_Mutation
TNBC10	TNBC10-PostT_Area1	PostT	10.5724	13269	1214	9.15		TNBC10-PostT_Area1						Missense_Mutation;novel																														Missense_Mutation;novel
TNBC10	TNBC10-PostT_Area2	PostT	7.1213	10780	993	9.21		TNBC10-PostT_Area2						Missense_Mutation;novel																Missense_Mutation;novel	Missense_Mutation;novel
TNBC10	TNBC10-PostT_Area3	PostT	10.9832	13883	1294	9.32		TNBC10-PostT_Area3						multi_hit;novel
TNBC10	TNBC10_PreT	PreT	11.8597	13190	1236	9.37		TNBC10_PreT							Missense_Mutation												multi_hit														Missense_Mutation		multi_hit
TNBC11	TNBC11-mid	MidT	11.6406	13204	1465	11.1		TNBC11-mid								Missense_Mutation;novel											Missense_Mutation					Missense_Mutation;novel			Missense_Mutation;novel
TNBC11	TNBC11-PostT_Area1	PostT	8.1621	10918	1280	11.72		TNBC11-PostT_Area1								Missense_Mutation;novel
TNBC11	TNBC11-PostT_Area2	PostT	13.7222	12213	1494	12.23		TNBC11-PostT_Area2								Missense_Mutation;novel
TNBC11	TNBC11_PreT	PreT	11.3393	12551	1432	11.41		TNBC11_PreT																			Missense_Mutation
TNBC11	TNBC11-rec	R	10.0794	10951	1301	11.88		TNBC11-rec																											Missense_Mutation;novel
TNBC12	TNBC12_PreT	PreT	11.7775	14453	1735	12		TNBC12_PreT										Missense_Mutation					Missense_Mutation																										Missense_Mutation
TNBC12	TNBC12-PostT	PostT	9.12074	12566	1525	12.14		TNBC12-PostT										Missense_Mutation									Missense_Mutation;novel
TNBC13	TNBC13-mid	MidT	8.87423	13423	1184	8.82		TNBC13-mid																																								Missense_Mutation
TNBC13	TNBC13_PreT	PreT	11.9693	14006	1247	8.9		TNBC13_PreT																																								Missense_Mutation
TNBC14	TNBC14-PostT_Area4	PostT	8.79207	9959	1185	11.9		TNBC14-PostT_Area4								Missense_Mutation;novel							Missense_Mutation;novel																		Missense_Mutation;novel		Missense_Mutation
TNBC14	TNBC14_PreT	PreT	7.44997	9802	1116	11.39		TNBC14_PreT													Missense_Mutation																						Missense_Mutation
TNBC14	TNBC14-PostT_Area1	PostT	14.4343	11415	1315	11.52		TNBC14-PostT_Area1													Missense_Mutation																						Missense_Mutation						Missense_Mutation;novel
TNBC14	TNBC14-PostT_Area3	PostT	12.4623	10851	1285	11.84		TNBC14-PostT_Area3													Missense_Mutation																						Missense_Mutation
TNBC14	TNBC14-PostT_Area2	PostT	5.97094	8178	1023	12.51		TNBC14-PostT_Area2																																			Missense_Mutation
TNBC15	TNBC15-PostT_Area1	PostT	11.531	12268	1305	10.64		TNBC15-PostT_Area1		Missense_Mutation;novel		Missense_Mutation;novel														Missense_Mutation
TNBC15	TNBC15-PostT_Area2	PostT	11.7228	12565	1275	10.15		TNBC15-PostT_Area2		Missense_Mutation;novel						Missense_Mutation;novel																																Missense_Mutation;novel
TNBC15	TNBC15-mid	MidT	8.32644	10899	1067	9.79		TNBC15-mid								Missense_Mutation;novel										Missense_Mutation							Missense_Mutation;novel															Missense_Mutation;novel
TNBC15	TNBC15_PreT	PreT	8.92901	12190	1245	10.21		TNBC15_PreT																		Missense_Mutation																	multi_hit
TNBC15	TNBC15-PostT_Area3	PostT	11.7501	14090	1422	10.09		TNBC15-PostT_Area3																		Missense_Mutation			Missense_Mutation;novel		Missense_Mutation;novel																	Missense_Mutation;novel
TNBC16	TNBC16-PostT_Area2	PostT	9.25769	9926	969	9.76		TNBC16-PostT_Area2	Missense_Mutation;novel											Frame_Shift_Del							Missense_Mutation;novel						Missense_Mutation													Missense_Mutation
TNBC16	TNBC16_PreT	PreT	8.05255	9508	846	8.9		TNBC16_PreT												Frame_Shift_Del													Missense_Mutation													Missense_Mutation
TNBC16	TNBC16-PostT_Area1	PostT	8.60034	9758	936	9.59		TNBC16-PostT_Area1																			Missense_Mutation;novel						Missense_Mutation
TNBC16	TNBC16-PostT_Area3	PostT	8.10733	9618	886	9.21		TNBC16-PostT_Area3																			Missense_Mutation;novel						Missense_Mutation													Missense_Mutation
TNBC17	TNBC17_PreT	PreT	15.6121	14134	1350	9.55		TNBC17_PreT					Missense_Mutation							multi_hit																							Missense_Mutation						Missense_Mutation
TNBC17	TNBC17-PostT	PostT	13.8044	11064	1151	10.4		TNBC17-PostT					Missense_Mutation			Missense_Mutation;novel																	Missense_Mutation;novel																Missense_Mutation
TNBC17	TNBC17-rec	R	7.50475	8290	950	11.46		TNBC17-rec																	Missense_Mutation;novel				Missense_Mutation;novel				Missense_Mutation;novel
TNBC18	TNBC18-PostT_Area2	PostT	12.9279	11464	1036	9.04		TNBC18-PostT_Area2							Missense_Mutation;novel		Missense_Mutation;novel				Missense_Mutation						Frame_Shift_Del
TNBC18	TNBC18-PostT_Area1	PostT	9.96982	10796	938	8.69		TNBC18-PostT_Area1									Missense_Mutation;novel				Missense_Mutation						Frame_Shift_Del				Missense_Mutation;novel
TNBC18	TNBC18-PostT_Area4	PostT	10.3807	10331	861	8.33		TNBC18-PostT_Area4									Missense_Mutation;novel										Frame_Shift_Del
TNBC18	TNBC18_PreT	PreT	8.21688	10423	924	8.87		TNBC18_PreT													Missense_Mutation						Frame_Shift_Del																Missense_Mutation
TNBC18	TNBC18-PostT_Area3	PostT	10.8189	11108	961	8.65		TNBC18-PostT_Area3													Missense_Mutation						Frame_Shift_Del
TNBC18	TNBC18-rec	R	9.94243	9992	871	8.72		TNBC18-rec																			Frame_Shift_Del												Missense_Mutation;novel				Missense_Mutation
TNBC19	TNBC19_PreT	PreT	9.77809	11734	1674	14.27		TNBC19_PreT					Missense_Mutation		Missense_Mutation								Missense_Mutation
TNBC19	TNBC19-PostT_Area3	PostT	9.99721	13390	1940	14.49		TNBC19-PostT_Area3							Missense_Mutation
TNBC19	TNBC19-PostT_Area4	PostT	9.53159	12295	1721	14		TNBC19-PostT_Area4							Missense_Mutation							Missense_Mutation;novel
TNBC19	TNBC19-PostT_Area1	PostT	9.55897	13141	1886	14.35		TNBC19-PostT_Area1														Missense_Mutation;novel
TNBC19	TNBC19-PostT_Area2	PostT	10.1342	11891	1708	14.36		TNBC19-PostT_Area2																									Missense_Mutation;novel
TNBC20	TNBC20-PostT_Area3	PostT	9.03857	10882	1248	11.47		TNBC20-PostT_Area3	Missense_Mutation;novel																		Missense_Mutation;novel																		Missense_Mutation;novel			Missense_Mutation;novel
TNBC20	TNBC20_PreT	PreT	9.06596	12563	1188	9.46		TNBC20_PreT										Missense_Mutation			Missense_Mutation		Missense_Mutation
TNBC21	TNBC21-mid	MidT	1.23253	11254	0	0		TNBC21-mid																										Missense_Mutation;novel
TNBC21	TNBC21-rec_Area1	R	1.99944	10308	26	0.25		TNBC21-rec_Area1																										Missense_Mutation;novel										Splice_Site
TNBC21	TNBC21-rec_Area2	R	1.94466	10464	6	0.06		TNBC21-rec_Area2																										Missense_Mutation;novel										Splice_Site
TNBC21	TNBC21-rec_Area3	R	1.64338	10110	5	0.05		TNBC21-rec_Area3																										Missense_Mutation;novel										Splice_Site
TNBC21	TNBC21-rec_Area4	R	1.75294	9501	15	0.16		TNBC21-rec_Area4																										Missense_Mutation;novel										Splice_Site
TNBC21	TNBC21-PostT_Area2	PostT	1.01342	11135	0	0		TNBC21-PostT_Area2																										Missense_Mutation;novel
TNBC21	TNBC21_PreT	PreT	1.09558	10011	0	0		TNBC21_PreT																																				Splice_Site
TNBC22	TNBC22-rec	R	10.7641	11012	1182	10.73		TNBC22-rec			Missense_Mutation;novel																multi_hit																				Missense_Mutation
TNBC22	TNBC22-PostT_Area1	PostT	12.7909	12172	1206	9.91		TNBC22-PostT_Area1			Missense_Mutation;novel					Missense_Mutation											multi_hit														Missense_Mutation;novel
TNBC22	TNBC22-PostT_Area2	PostT	13.3387	12680	1292	10.19		TNBC22-PostT_Area2			Missense_Mutation;novel					Missense_Mutation				Missense_Mutation;novel			Missense_Mutation																				Missense_Mutation
TNBC22	TNBC22_PreT	PreT	14.8726	12841	1450	11.29		TNBC22_PreT								Missense_Mutation		Missense_Mutation					Missense_Mutation				multi_hit			Missense_Mutation										Missense_Mutation			Missense_Mutation				Missense_Mutation
TNBC22	TNBC22-PostT_Area3	PostT	10.3533	11001	1117	10.15		TNBC22-PostT_Area3								Missense_Mutation		Missense_Mutation																									Missense_Mutation
TNBC22	TNBC22-PostT_Area4	PostT	12.3801	11219	1145	10.21		TNBC22-PostT_Area4												Missense_Mutation;novel																					Missense_Mutation;novel		Missense_Mutation				Missense_Mutation
[truncated: 19 more columns]

## Sheet: Table S6 - SNV drivers
Gene	dNdScv	OncodriveFML
TP53	x	x
MICA	x
CYP2D6	x
Results from dNdScv
Gene	n_syn	n_mis	n_non	n_spl	n_ind	wmis_cv	wnon_cv	wspl_cv	wind_cv	pmis_cv	ptrunc_cv	pallsubs_cv	pind_cv	qmis_cv	qtrunc_cv	qallsubs_cv	qind_cv	pglobal_cv	qglobal_cv
MICA	3	9	0	0	2	7.36	0	0	1119	0.00119	0.6647	0.00396	9.6e-06	0.6307	0.94	0.947	0.184	6.87e-07	0.0103
CYP2D6	0	7	0	1	1	21.23	51.8	51.8	663	2.7e-05	0.0149	4.04e-05	0.0015	0.1299	0.94	0.259	1	1.07e-06	0.0103
TP53	0	7	1	0	1	15.02	25.3	25.3	926	0.000145	0.0331	0.000324	0.00108	0.3089	0.94	0.692	1	5.54e-06	0.0355
Results from OncodriveFML
Gene	MUTS	P_VALUE	Q_VALUE	P_VALUE_NEG	Q_VALUE_NEG	SNP	MNP	INDELS
TP53	8	1.3e-05	0.041964	0.999987	0.999987	8	0	0

## Sheet: Table S7 - Mut Signatures
Patient	Sample Name		Time-point	De-novo Signatures		COSMIC Signatures
		table 7 order		Sign.01	Sign.02	COSMIC.1	COSMIC.3	COSMIC.5	COSMIC.6	COSMIC.13
TNBC1	TNBC1_PreT	TNBC1_pt	PreT	0.943371	0.0566293	0.415171	0.0502999	0.517436	0	0.0170926
TNBC2	TNBC2_PreT	TNBC2_pt	PreT	0.894073	0.105927	0.405799	0	0.517086	0.0327238	0.0443911
TNBC3	TNBC3_PreT	TNBC3_pt	PreT	0.898144	0.101856	0.355986	0	0.575654	0.0350886	0.0332712
TNBC4	TNBC4_PreT	TNBC4_pt	PreT	0.926409	0.073591	0.28154	0.0311166	0.48855	0.173359	0.0254343
TNBC5	TNBC5_PreT	TNBC5_pt	PreT	0.89848	0.10152	0.418797	0.0284191	0.383929	0.128423	0.0404323
TNBC6	TNBC6_PreT	TNBC6_pt	PreT	0.0273171	0.972683	0	0.68163	0	0.0353437	0.283027
TNBC6	TNBC6-rec_Node	TNBC6_rN	R	0.443942	0.556058	0.165954	0.586542	0	0	0.247504
TNBC6	TNBC6-rec_Skin	TNBC6_rSk	R	0.300503	0.699497	0.14941	0.53373	0	0	0.31686
TNBC7	TNBC7_PreT	TNBC7_pt	PreT	0.972841	0.0271586	0.458459	0	0.463538	0.0736776	0.00432574
TNBC7	TNBC7-rec_Node	TNBC7_rN	R	0.929617	0.0703831	0.297023	0	0.702977	0	0
TNBC7	TNBC7-rec_Skin	TNBC7_rSK	R	0.94312	0.0568797	0.326229	0	0.605297	0.0564983	0.0119753
TNBC8	TNBC8_PreT	TNBC8_pt	PreT	0.947006	0.0529944	0.459163	0.0544973	0.474007	0.00631247	0.0060199
TNBC8	TNBC8-PostT	TNBC8_s1F	PostT	0.938977	0.0610228	0.394058	0	0.548829	0.0492215	0.00789105
TNBC9	TNBC9_PreT	TNBC9_pt	PreT	0.914876	0.0851235	0.358123	0	0.479322	0.135015	0.0275398
TNBC9	TNBC9-PostT	TNBC9_s1BU	PostT	0.954907	0.0450926	0.414191	0	0.474089	0.090143	0.0215775
TNBC10	TNBC10_PreT	TNBC10_pt	PreT	0.920225	0.0797747	0.345478	0.0156209	0.433324	0.182235	0.0233418
TNBC10	TNBC10-PostT_Area1	TNBC10_s1A2	PostT	0.913863	0.0861369	0.407231	0.00984071	0.510209	0.0525437	0.0201753
TNBC10	TNBC10-PostT_Area2	TNBC10_s1A3	PostT	0.929159	0.0708406	0.228294	0	0.541329	0.204539	0.0258378
TNBC10	TNBC10-PostT_Area3	TNBC10_s1A4	PostT	0.95033	0.0496697	0.321709	0	0.67444	0	0.00385125
TNBC11	TNBC11-mid	TNBC11_M	MidT	0.966397	0.0336031	0.39621	0	0.562575	0.0389489	0.00226608
TNBC11	TNBC11_PreT	TNBC11_pt	PreT	0.936221	0.0637793	0.411628	0.0112272	0.551375	0.0174084	0.00836072
TNBC11	TNBC11-rec	TNBC11_r1A	R	0.972378	0.027622	0.384604	0	0.522798	0.0906483	0.00194882
TNBC11	TNBC11-PostT_Area1	TNBC11_s1E	PostT	0.916815	0.0831847	0.517928	0.0285611	0.436726	0	0.0167859
TNBC11	TNBC11-PostT_Area2	TNBC11_s1F	PostT	0.926842	0.0731577	0.422844	0	0.526677	0.0287863	0.0216926
TNBC12	TNBC12_PreT	TNBC12_pt	PreT	0.907793	0.0922067	0.37517	0.0725072	0.47509	0.0551518	0.0220805
TNBC12	TNBC12-PostT	TNBC12_s1B	PostT	0.902836	0.097164	0.328537	0.165728	0.382668	0.115209	0.00785826
TNBC13	TNBC13-mid	TNBC13_M	MidT	0.925641	0.0743591	0.614938	0.16436	0.216614	0	0.00408882
TNBC13	TNBC13_PreT	TNBC13_pt	PreT	0.928193	0.0718071	0.405152	0.0816214	0.379189	0.121632	0.0124065
TNBC14	TNBC14_PreT	TNBC14_pt	PreT	0.94612	0.0538799	0.327192	0	0.593333	0.067488	0.0119863
TNBC14	TNBC14-PostT_Area1	TNBC14_s1CL	PostT	0.903931	0.0960688	0.422702	0.0331653	0.37928	0.123422	0.0414302
TNBC14	TNBC14-PostT_Area2	TNBC14_s1CU	PostT	0.921196	0.0788038	0.491958	0.105132	0.391019	0.00988476	0.00200582
TNBC14	TNBC14-PostT_Area3	TNBC14_s1EL	PostT	0.938566	0.0614344	0.46192	0	0.422423	0.0896604	0.0259972
TNBC14	TNBC14-PostT_Area4	TNBC14_s1EU	PostT	0.953559	0.0464407	0.383941	0	0.464906	0.133948	0.0172052
TNBC15	TNBC15-mid	TNBC15_M	MidT	0.913063	0.0869369	0.393945	0.0176821	0.564672	0	0.023701
TNBC15	TNBC15-PostT_Area1	TNBC15_S1BL	PostT	0.913618	0.086382	0.447986	0.162293	0.34376	0.042095	0.00386556
TNBC15	TNBC15_PreT	TNBC15_pt	PreT	0.897132	0.102868	0.390247	0	0.515648	0.0580061	0.0360993
TNBC15	TNBC15-PostT_Area2	TNBC15_s1BU	PostT	0.921809	0.0781906	0.507291	0.135716	0.32871	0.0176046	0.0106778
TNBC15	TNBC15-PostT_Area3	TNBC15_s1E	PostT	0.90654	0.0934597	0.420829	0.074412	0.350884	0.125118	0.0287566
TNBC16	TNBC16_PreT	TNBC16_pt	PreT	0.888129	0.111871	0.380654	0.0333449	0.375751	0.160117	0.0501331
TNBC16	TNBC16-PostT_Area1	TNBC16_s1EL	PostT	0.879873	0.120127	0.308149	0.11363	0.373848	0.176287	0.0280868
TNBC16	TNBC16-PostT_Area2	TNBC16_s1ER	PostT	0.889315	0.110685	0.309322	0	0.551878	0.105179	0.0336206
TNBC16	TNBC16-PostT_Area3	TNBC16_s1K	PostT	0.90515	0.0948502	0.34583	0.00694911	0.50291	0.116025	0.0282859
TNBC17	TNBC17_PreT	TNBC17_pt	PreT	0.89638	0.10362	0.252167	0.0924794	0.378066	0.239413	0.0378748
TNBC17	TNBC17-rec	TNBC17_r2A	R	0.887956	0.112044	0.217196	0.201796	0.413216	0.140058	0.0277345
TNBC17	TNBC17-PostT	TNBC17_s1D	PostT	0.901018	0.098982	0.377337	0.116263	0.356612	0.122444	0.0273439
TNBC18	TNBC18_PreT	TNBC18_pt	PreT	0.943284	0.0567163	0.371195	0	0.614928	0.00821158	0.00566538
TNBC18	TNBC18-rec	TNBC18_r1A	R	0.902135	0.097865	0.314228	0.0753877	0.459415	0.122007	0.0289617
TNBC18	TNBC18-PostT_Area1	TNBC18_s3A	PostT	0.920416	0.0795843	0.431846	0.0440817	0.482961	0.0201986	0.0209125
TNBC18	TNBC18-PostT_Area2	TNBC18_s3D	PostT	0.873533	0.126467	0.394775	0.05535	0.488287	0.0225368	0.0390518
TNBC18	TNBC18-PostT_Area3	TNBC18_s3E	PostT	0.908181	0.0918193	0.414525	0	0.548645	0	0.0368302
TNBC18	TNBC18-PostT_Area4	TNBC18_s3F	PostT	0.875311	0.124689	0.244509	0	0.559531	0.156074	0.0398866
TNBC19	TNBC19_PreT	TNBC19_pt	PreT	0.938231	0.0617693	0.54791	0.0437766	0.363358	0.0436649	0.0012908
TNBC19	TNBC19-PostT_Area1	TNBC19_s1BL	PostT	0.944913	0.0550875	0.490911	0	0.506652	0	0.00243682
TNBC19	TNBC19-PostT_Area2	TNBC19_s1BU	PostT	0.964597	0.0354031	0.340716	0.0288373	0.493262	0.137184	0
TNBC19	TNBC19-PostT_Area3	TNBC19_s1DL	PostT	0.934689	0.0653111	0.466504	0.113906	0.358614	0.0590731	0.00190282
TNBC19	TNBC19-PostT_Area4	TNBC19_s1DU	PostT	0.997558	0.00244185	0.415114	0	0.452939	0.131947	0
TNBC20	TNBC20_PreT	TNBC20_pt	PreT	0.853338	0.146662	0.361007	0	0.532755	0.0547796	0.051459
TNBC20	TNBC20-PostT_Area1	TNBC20_s1A	PostT	0.87231	0.12769	0.469415	0.0473613	0.436433	0	0.0467906
TNBC20	TNBC20-PostT_Area2	TNBC20_s1B	PostT	0.915895	0.0841047	0.551425	0	0.409801	0.013935	0.0248394
TNBC20	TNBC20-PostT_Area3	TNBC20_s1C	PostT	0.934494	0.0655059	0.434057	0	0.541735	0	0.0242081
TNBC21	TNBC21-mid	TNBC21_M	MidT	0	1	0	0.751417	0	0.0232183	0.225365
TNBC21	TNBC21_PreT	TNBC21_pt	PreT	0	1	0	0.574152	0	0.032087	0.393761
TNBC21	TNBC21-rec_Area1	TNBC21_r1A	R	0.0956136	0.904386	0.0897997	0.672241	0	0.0449794	0.19298
TNBC21	TNBC21-rec_Area2	TNBC21_r1BL	R	0.112563	0.887437	0.146186	0.660604	0	0.027792	0.165417
TNBC21	TNBC21-rec_Area3	TNBC21_r1BU	R	0.0719184	0.928082	0.143164	0.671648	0	0	0.185188
TNBC21	TNBC21-rec_Area4	TNBC21_r1C	R	0.215548	0.784452	0.284299	0.509186	0	0	0.206514
TNBC21	TNBC21-PostT_Area1	TNBC21_s1EL	PostT	0.268626	0.731374	0.282693	0.512157	0	0.0341901	0.170959
TNBC21	TNBC21-PostT_Area2	TNBC21_s1ER	PostT	0.0264696	0.97353	0.140352	0.697475	0	0.0133514	0.148821
TNBC22	TNBC22_PreT	TNBC22_pt	PreT	0.921077	0.0789227	0.460736	0.00175241	0.454322	0.0604662	0.0227236
TNBC22	TNBC22-rec	TNBC22_r1A	R	0.945654	0.0543456	0.568258	0	0.374857	0.0333366	0.0235481
TNBC22	TNBC22-PostT_Area1	TNBC22_s1B1	PostT	0.928444	0.0715561	0.458353	0	0.472203	0.0475917	0.0218517
TNBC22	TNBC22-PostT_Area2	TNBC22_s1B2	PostT	0.951321	0.0486789	0.462627	0	0.431043	0.0838782	0.0224516
TNBC22	TNBC22-PostT_Area3	TNBC22_s1D1	PostT	0.895144	0.104856	0.341339	0.0627964	0.504066	0.072866	0.0189326
TNBC22	TNBC22-PostT_Area4	TNBC22_s1D2	PostT	0.932719	0.0672806	0.548543	0	0.42132	0	0.0301372

## Sheet: Table S8 - SV burden
Patient	Sample Name	Time-point	Inversion	Deletion	Breakend	Duplication	Insertion	Total
TNBC1	TNBC1_PreT	PreT	0	19	14	2	0	35
TNBC2	TNBC2_PreT	PreT	3	6	6	3	0	18
TNBC3	TNBC3_PreT	PreT	1	13	24	9	0	47
TNBC4	TNBC4_PreT	PreT	4	17	2	8	0	31
TNBC5	TNBC5_PreT	PreT	3	31	18	6	0	58
TNBC6	TNBC6_PreT	PreT	0	9	2	1	0	12
TNBC6	TNBC6-rec_Skin	R	1	3	2	5	0	11
TNBC6	TNBC6-rec_Node	R	1	2	2	3	0	8
TNBC7	TNBC7-rec_Skin	R	5	6	18	3	0	32
TNBC7	TNBC7_PreT	PreT	4	6	14	0	0	24
TNBC7	TNBC7-rec_Node	R	1	3	10	0	0	14
TNBC8	TNBC8-PostT	PostT	0	4	8	1	0	13
TNBC8	TNBC8_PreT	PreT	1	6	4	2	0	13
TNBC9	TNBC9-PostT	PostT	3	10	28	5	0	46
TNBC9	TNBC9_PreT	PreT	2	9	8	3	1	23
TNBC10	TNBC10-PostT_Area1	PostT	1	27	6	0	0	34
TNBC10	TNBC10-PostT_Area3	PostT	2	25	14	2	0	43
TNBC10	TNBC10_PreT	PreT	1	24	16	2	0	43
TNBC10	TNBC10-PostT_Area2	PostT	2	22	0	0	0	24
TNBC11	TNBC11-mid	MidT	11	17	18	2	0	48
TNBC11	TNBC11_PreT	PreT	3	14	18	1	0	36
TNBC11	TNBC11-rec	R	3	14	14	1	0	32
TNBC11	TNBC11-PostT_Area2	PostT	1	10	10	2	0	23
TNBC11	TNBC11-PostT_Area1	PostT	2	8	8	0	1	19
TNBC12	TNBC12_PreT	PreT	9	19	8	4	1	41
TNBC12	TNBC12-PostT	PostT	2	15	12	2	0	31
TNBC13	TNBC13_PreT	PreT	3	7	20	2	0	32
TNBC13	TNBC13-mid	MidT	9	7	16	2	0	34
TNBC14	TNBC14-PostT_Area1	PostT	0	13	12	3	0	28
TNBC14	TNBC14-PostT_Area3	PostT	1	10	8	4	0	23
TNBC14	TNBC14-PostT_Area2	PostT	1	7	8	0	0	16
TNBC14	TNBC14_PreT	PreT	2	5	6	1	0	14
TNBC14	TNBC14-PostT_Area4	PostT	0	3	4	1	0	8
TNBC15	TNBC15_PreT	PreT	3	3	14	5	2	27
TNBC15	TNBC15-PostT_Area1	PostT	1	4	10	7	1	23
TNBC15	TNBC15-PostT_Area2	PostT	1	5	10	10	1	27
TNBC15	TNBC15-mid	MidT	1	6	6	9	1	23
TNBC15	TNBC15-PostT_Area3	PostT	2	8	6	5	2	23
TNBC16	TNBC16-PostT_Area1	PostT	0	7	0	0	0	7
TNBC16	TNBC16-PostT_Area2	PostT	2	7	4	1	0	14
TNBC16	TNBC16-PostT_Area3	PostT	0	6	4	0	0	10
TNBC16	TNBC16_PreT	PreT	0	5	2	2	0	9
TNBC17	TNBC17_PreT	PreT	48	19	18	5	1	91
TNBC17	TNBC17-PostT	PostT	2	15	4	3	0	24
TNBC17	TNBC17-rec	R	1	5	4	1	0	11
TNBC18	TNBC18-PostT_Area1	PostT	0	23	4	1	0	28
TNBC18	TNBC18_PreT	PreT	0	18	6	0	0	24
TNBC18	TNBC18-PostT_Area2	PostT	0	18	0	0	0	18
TNBC18	TNBC18-PostT_Area3	PostT	0	18	4	0	0	22
TNBC18	TNBC18-rec	R	0	16	2	0	0	18
TNBC18	TNBC18-PostT_Area4	PostT	0	16	2	1	0	19
TNBC19	TNBC19-PostT_Area1	PostT	0	26	8	1	0	35
TNBC19	TNBC19-PostT_Area3	PostT	1	25	8	0	0	34
TNBC19	TNBC19-PostT_Area4	PostT	0	24	6	2	0	32
TNBC19	TNBC19-PostT_Area2	PostT	0	23	6	3	0	32
TNBC19	TNBC19_PreT	PreT	0	16	2	1	0	19
TNBC20	TNBC20_PreT	PreT	3	18	6	5	0	32
TNBC20	TNBC20-PostT_Area1	PostT	1	8	4	7	0	20
TNBC20	TNBC20-PostT_Area2	PostT	1	5	4	2	0	12
TNBC20	TNBC20-PostT_Area3	PostT	1	5	2	1	0	9
TNBC21	TNBC21-rec_Area1	R	0	2	12	5	0	19
TNBC21	TNBC21-rec_Area3	R	0	2	10	3	0	15
TNBC21	TNBC21-rec_Area2	R	0	2	8	5	0	15
TNBC21	TNBC21-PostT_Area2	PostT	0	1	8	4	0	13
TNBC21	TNBC21-mid	MidT	0	3	6	5	0	14
TNBC21	TNBC21-rec_Area4	R	0	2	6	4	0	12
TNBC21	TNBC21-PostT_Area1	PostT	0	0	6	2	0	8
TNBC21	TNBC21_PreT	PreT	1	2	5	2	0	10
TNBC22	TNBC22-PostT_Area3	PostT	2	22	4	2	1	31
TNBC22	TNBC22-PostT_Area2	PostT	2	21	2	4	1	30
TNBC22	TNBC22-PostT_Area4	PostT	4	21	6	3	1	35
TNBC22	TNBC22_PreT	PreT	1	19	2	3	0	25
TNBC22	TNBC22-rec	R	1	19	4	1	1	26
TNBC22	TNBC22-PostT_Area1	PostT	6	19	6	2	1	34

## Sheet: Table S9 - TNBC CNA genes
GENE	Lehmann, et al 2021	Derakhshan et al, 2022
AKT1	x	x
AKT2	x	x
AKT3	x
B2M	x
BAP1	x
BCL11A	x
BRCA1	x
BRCA2	x	x
BRD4	x
CCND3	x	x
CCNE1	x	x
CDK6	x	x
CDKN2A	x	x
CDKN2B	x	x
CREBBP	x
DNMT3A	x	x
EGFR	x	x
ESR1	x	x
ETV6	x
FGFR1	x	x
IGF1R	x	x
JAK	x
KDM6A	x
KDR	x
KIT	x
KRAS	x	x
MAP3K1	x	x
MCL1	x
MDM2	x	x
MYB	x
MYC	x	x
MYCN	x
NCOR1	x	x
NF1	x	x
NF1B	x
NOTCH3	x
PBRM1	x
PDGFRA	x	x
PIK3CA	x	x
PIM1	x
PTEN	x	x
RB1	x	x
SMAD4	x	x
SMARCD1	x
TP53	x	x
MDM4	x

[truncated: 5 more sheets: Table S10 - GISTIC CNA, Table S11 - GIN, Ploidy, WGD, Table S12 - scarHRD, Table S13 - ChrArm Aneuploidy, Table S14 - LMM Summary Table]
